1 **Article type: Original Article**

2 **Full Title: ZmCLA4 regulates leaf angle through multiple plant**

3 **hormone-mediated signal pathways in maize**

4 **Running title: ZmCLA4 regulates leaf angle**

5 Dandan Dou<sup>a</sup>, Shengbo Han<sup>a</sup>, Lixia Ku<sup>a\*</sup>, Huafeng Liu, Huihui Su, Zhenzhen Ren, Dongling

6 Zhang, Haixia Zeng, Yahui Dong, Zhixie Liu, Fangfang Zhu, Qiannan Zhao, Jiarong Xie, Yajing

7 Liu, Haiyang Cheng, Yanhui Chen\*

8 College of Agronomy, Synergetic Innovation Center of Henan Grain Crops and National Key

9 Laboratory of Wheat and Maize Crop Science, Henan Agricultural University, No. 15 Longzihu

10 University Park, Zhengdong New Area, Zhengzhou, Henan, 450046, China

11 <sup>a</sup>These authors contributed equally to this work

12 \*Correspondence should be addressed to Y.C. (chy9890@163.com), or L. K.

13 ([kulixia0371@163.com](mailto:kulixia0371@163.com))

14

15

16

17

18

19

20

21 **Abstract**

22 Leaf angle in cereals is an important agronomic trait contributing to plant architecture  
23 and grain yield by determining the plant compactness. Although ZmCLA4 was  
24 identified to shape plant architecture by affecting leaf angle, the detailed regulatory  
25 mechanism of ZmCLA4 in maize remains unclear. ZmCLA4 was identified as a  
26 transcriptional repressor using the Gal4-LexA/UAS system and transactivation  
27 analysis in yeast. The DNA affinity purification (DAP)-seq assay showed that  
28 ZmCLA4 not only acts as a repressor containing the EAR motif (CACCGGAC), but  
29 was also found to have two new motifs, CCGARGS and CDTCNTC. On analyzing  
30 the ZmCLA4-bound targeted genes, we found that ZmCLA4, as a cross node of  
31 multiple plant hormone-mediated pathways, directly bound to ARF22 and IAA26 to  
32 regulate auxin transport and mediated brassinosteroid signaling by directly binding to  
33 BZR3 and 14-3-3. ZmCLA4 bound two WRKY genes involved with abscisic acid,  
34 two genes (CYP75B1, CYP93D1) involved with jasmonic acid, B3 involved in the  
35 response to ethylene, and thereby negatively regulated leaf angle formation. We built  
36 a new regulatory network for the *ZmCLA4* gene controlling leaf angle in maize, which  
37 contributed to the understanding of ZmCLA4's regulatory mechanism and will  
38 improve grain yields by facilitating optimization of plant architecture.

39

40 **Key words:** DNA affinity purification (DAP)-Seq, leaf angle, maize, regulatory  
41 mechanism, regulatory network

42

## 43 **Introduction**

44 In the past few decades, improvement in plant architecture, especially the varieties  
45 with erect leaves, has played an important role in the genetic gain of maize yield  
46 (Lambert *et al.*, 1978; Tian *et al.*, 2011). Upright leaves may have the additional  
47 benefit of reducing shade from neighboring plants, thereby increased planting density  
48 (Dubois and Brutnell, 2011). Therefore, it is an important selection target for ideal  
49 plant type breeding to have an upward leaf angle, and of great significance to clarify  
50 the genetic basis of the leaf angle for ideal maize breeding.

51 Research over the past several decades has identified quantitative trait loci (QTL)  
52 that regulate leaf angle by using bi-parental populations (Mickelson *et al.*, 2002; Lu *et*  
53 *al.*, 2007; Ku *et al.*, 2010, 2012; Chen *et al.*, 2015; Li *et al.*, 2015), and nested  
54 association mapping populations (Tian *et al.*, 2011) in maize. Taking advantage of 3D  
55 images from potted plants grown under greenhouse conditions, QTL analyses have  
56 been performed in maize using leaf angle data collected throughout the canopy at  
57 different developmental stages (McCormick *et al.*, 2016; Zhang *et al.*, 2017). QTLs  
58 explained between 0.45% and 85% of the phenotypic variance. Tian *et al.* (2019)  
59 mapped 12 QTLs for leaf angle in a population of 866 maize–teosinte BC<sub>2</sub>S<sub>3</sub>  
60 recombinant inbred lines derived from a cross between the maize inbred line W22 and  
61 the teosinte accession CIMMYT 8759. To date, in the multiple QTLs that have been  
62 located, only six genes have been reported as a result of the combined use of  
63 quantitative genetics (Ku *et al.*, 2011; Zhang *et al.*, 2014; Ren *et al.*, 2020; Tian *et al.*,  
64 2019; Cao *et al.*, 2020). The first reported candidate gene, *ZmTAC1*, on a major QTL

65 for LA that was detected on chromosome 2, was cloned using a comparative  
66 genomics method (Ku *et al.*, 2011). A nucleotide mutation in the 5'-untranslated  
67 region (UTR) influenced *ZmTAC1* expression (Ku *et al.*, 2011). UPA1 (Upright Plant  
68 Architecture1) and UPA2, two QTLs conferring upright plant architecture, were  
69 cloned by map-based cloning (Tian *et al.*, 2019). UPA2 is controlled by a two-base  
70 sequence polymorphism that regulates the expression of a B3-domain transcription  
71 factor (*ZmRAVL1*) located 9.5 kilobases downstream. UPA2 exhibits differential  
72 binding by DRL1 (DROOPING LEAF1), and DRL1 physically interacts with *LG1*  
73 (*LIGULELESS1*) and represses *LG1* activation of *ZmRAVL1*. *ZmRAVL1* regulates  
74 *brd1* (brassinosteroid C-6 oxidase1), which underlies UPA1, altering endogenous  
75 brassinosteroid content and leaf angle (Tian *et al.*, 2019). *ZmLIII*, a candidate gene of  
76 qLA2 on chromosome 2, directly binds to the promoters of the downstream gene *LG1*  
77 and activates *LG1* to further increase leaf angle (Ren *et al.*, 2020). Ren *et al.* (2020)  
78 also found that *ZmLIII* and CYP90D1 formed a negative feedback loop to maintain  
79 the balance of brassinolide in maize. Cao *et al.* (2020) demonstrated that *ZmIBH1-1*  
80 cloned by a map-based method negatively regulated leaf angle by causing cell wall  
81 lignification and cell elongation in the ligular region in maize.

82 In our previous study, *ZmCLA4* cloned by a map-based method (Zhang *et al.*,  
83 2014) was identified as the ortholog of *LAZY1* in rice and *Arabidopsis*. *ZmCLA4*  
84 plays a negative role in the control of the maize leaf angle through the alteration of  
85 mRNA accumulation, leading to altered shoot gravitropism and cell development. In  
86 rice, *LAZY1* regulates rice shoot gravitropism and tiller/leaf angle through an

87 asymmetrical auxin pathway, which affects auxin transport, leading to its  
88 asymmetrical distribution (Li *et al.*, 2007; Yoshihara and Iino, 2007). Zhang *et al.*  
89 (2018) demonstrated through transcriptome analysis that HSFA2D acts as a positive  
90 regulatory protein and plays a role upstream of LAZY1, and two transcription factors,  
91 WOX6 and WOX11, which are functionally redundant, play a role downstream of the  
92 LAZY1 signaling pathway in rice. Chen *et al.* (2011) showed that  
93 OsPIN2-overexpressing plants suppressed the expression of the gravitropism-related  
94 gene *OsLAZY1* in shoots, but did not alter the expression of OsPIN1b and OsTAC1,  
95 which were reported as tiller angle controllers. Li *et al.* (2019) showed that OsBRXL4  
96 regulated shoot gravitropism by affecting polar auxin transport, similar to LAZY1.  
97 From the sequence analysis of AtLAZY1, Yoshihara *et al.* (2013) demonstrated that  
98 the functional domains inferred were nuclear localization signals, located between  
99 regions III and IV, and an EAR motif located in conserved region V. EAR motifs are  
100 often found in transcription regulators, and in many cases function as repressors  
101 (Kazan, 2006; Kagale *et al.*, 2010). Although the identification and characterization of  
102 ZmCLA4 have increased our understanding of the role of gravitropism in shaping  
103 plant architecture, the detailed molecular mechanism involved in the regulation of  
104 polar auxin transport by LAZY1 remains unclear in plants. In this study, ZmCLA4  
105 was identified as a transcriptional repressor using the Gal4-LexA/UAS system and  
106 transactivation analysis in yeast. The DNA affinity purification (DAP)-Seq assay  
107 showed that ZmCLA4, acting as a repressor, contained the EAR motif (CACCGGAC)  
108 and two new motifs (CCGARGS and CDTCNTC). Through the analysis of targeted

109 genes bound by ZmCLA4, acting as a cross node of multiple plant hormone-mediated  
110 signaling pathways, ZmCLA4 not only directly bound to ARF22 and IAA26 to  
111 regulate auxin transport but also mediated brassinosteroid signal transduction by  
112 directly binding to BZR3 and 14-3-3. Additionally, it bound WRKYs involved with  
113 abscisic acid (ABA), two genes (CYP75B1, CYP93D1) involved with jasmonic acid  
114 (JA), and B3 involved in the response to ethylene, and thereby affected leaf angle  
115 formation. The results contributed to a better understanding of the ZmCLA4  
116 regulatory pathways.

## 117 **Materials and methods**

### 118 **Plant materials**

119 The ZmCLA4-RNAi-transgenic (ZmCLA4-RT) line, with Yu368 as the genetic  
120 background, and the wild-type (WT) line (Zhang *et al.*, 2014) were sown in 2018.  
121 During the growth of the ZmCLA4-RT and WT lines, a sample from the leaf pulvinus  
122 in the 9-, 10-, and 11-leaf stages were obtained for each, immediately frozen in liquid  
123 nitrogen, and stored at -80°C before RNA/DNA extraction for molecular  
124 characterization and determination of the molecular mechanism of ZmCLA4.

### 125 **Transcriptional activation assay in yeast**

126 The yeast strain YRG-2 (Stratagene, USA) containing the HIS3 and lacZ reporter  
127 genes was used to test transcriptional activation activity. The coding sequences (CDS)  
128 of ZmCLA4 were inserted into the pBD-GAL4 vector via EcoRI/SmaI sites, in which  
129 ZmCLA4 was fused with the GAL4 binding domain. The pBD-ZmCLA4,  
130 pBD-GAL4 (negative controls), and pGAL4 (positive control) plasmids were

131 independently transfected into YRG-2 cells. The transfected yeast cells were grown  
132 on YPDA medium or SD/-Trp/-His medium for 3 d at 30 °C.  $\beta$ -Galactosidase filter  
133 assays were also conducted to determine the  $\beta$ -galactosidase activity of the transfected  
134 yeast cells by monitoring the generation of blue color, according to the method  
135 described in the Yeast Protocols Handbook (PT3024-1).

#### 136 **Gal4/UAS System assay**

137 35S-ZmCLA4 contains the cauliflower-mosaic virus (CaMV) 35S promoter, which  
138 drives ZmCLA4 expression. 35S-Luciferase contains firefly luciferase driven by the  
139 constitutive CaMV-35S promoter. The reporter gene constructs (UAS-GUS) and  
140 effector constructs (VP16, Gal4, and IAA17) were described previously by Tiwari *et*  
141 *al.* (2001). The ZmCLA4-GAL4 effector construct contains the full-length ZmCLA4  
142 coding sequence fused to the N-terminus of the Gal4 DNA-binding domain under the  
143 control of the CaMV-35S promoter. The 35S-LUC construct was co-transformed as  
144 an internal control to normalize the GUS reporter gene expression. GUS and LUC  
145 enzymatic assays were performed in *Nicotiana benthamiana* leaves and performed  
146 according to Gampala *et al.* (2001).

#### 147 **DAP-Seq experiments**

148 DAP-Seq experiments were performed following the method described by O'Malley  
149 *et al.* (2016). First, a DAP-seq genomic DNA (gDNA) library was prepared by  
150 attaching a short DNA sequencing adaptor onto purified and fragmented gDNA. The  
151 adapter sequences were truncated Illumina TruSeq adapters; the TruSeq Universal  
152 and Index adapters corresponded to the DAP-seq Adapter A,

153 CACGACGCTCTTCCGATCT, and Adapter B, GATCGGAAGAGCACACGTCTG.  
154 The DAP gDNA library was prepared using the kit from NEBNext® DNA Library  
155 Prep Master Mix Set for Illumina® (NEB #E6040S/L). ZmIBH1-1 was fused to  
156 HaloTag using the kit from pFN19K HaloTag T7 SP6 Flexi Vecto (cat#G184A)  
157 (Promega). ZmCLA4 fused to HaloTag was expressed using the TnT SP6 High-Yield  
158 Wheat Germ Protein Expression System (L3260) (Promega), and then purified using  
159 Magne HaloTag Beads (G7281) (Promega) and Magne HaloTag Beads. Next, the  
160 ZmCLA4-HaloTag mixture was incubated with 500 ng DNA library in 40 ul PBS  
161 buffer with slow rotation in a cold room for 1.5 h. The beads were washed five times  
162 with 200 µL PBS + NP40 (0.005%), and then were resuspended into the PBS buffer.  
163 The supernatant was removed and 25 µL of the EB buffer was added and incubated  
164 for 10 min at 98 °C to elute the bound DNA from the beads. The correct DAP-Seq  
165 library concentration to achieve a specific read count was calculated based on the  
166 library fragment size. Negative control mock DAP-Seq libraries were prepared as  
167 described above but without the addition of protein to the beads.

### 168 **DAP-Seq data analysis**

169 We defined target genes as those that contained DAP-Seq peaks located within the  
170 transcribed regions of genes, in introns, 3 kb upstream of the transcription start site  
171 (TSS), or 3 kb downstream of the transcription termination site. DAP-Seq reads were  
172 aligned to the maize genome using Bowtie 2 (Langmead and Salzberg, 2012). Bowtie  
173 2 supports the gapped and paired-end alignment modes. We ran Bowtie version 2.2.3  
174 with default parameters and reported unique alignments. DAP-Seq peaks were



175 detected using MACS2 (Zhang *et al.*, 2008). We used MACS version 2.0.10, with  
176 default parameters because duplicates were allowed, with the q-value < 0.05.

### 177 **Electrophoretic mobility shift assay**

178 The full-length ZmCLA4 cDNA was amplified with gene primers (Supplementary  
179 Table S1) and fused into the *SgfI* and *PmeI* sites of pFN19K HaloTag<sup>®</sup> T7 SP6  
180 Flexi<sup>®</sup> Vector. The HaloTag-CLA4 fusion protein was expressed using the TNT<sup>®</sup>  
181 Coupled Wheat Germ Extract Systems (Promega, Fitchburg, WI, USA) and Magne<sup>®</sup>  
182 HaloTag Beads (Promega) EMSA. Oligonucleotide probes (Supplementary Table S1)  
183 were synthesized and labeled according to the standard protocol of Invitrogen  
184 Technology (Shanghai, China). We used standard reaction mixtures for the EMSA  
185 containing 20 ng of purified ZmCLA4 fusion protein, 5 ng of biotin-labeled annealed  
186 oligonucleotides, 2  $\mu$ L of 10 $\times$  binding buffer (100 mM Tris, 500 mM KCl, and 10  
187 mM DTT, pH 7.5), 1  $\mu$ L of 50% (v/v) glycerol, 1  $\mu$ L of 100 mM MgCl<sub>2</sub>, 1  $\mu$ L of 1  
188 mg mL<sup>-1</sup> poly(dI– dC), 1  $\mu$ L of 1% (v/v) Nonidet P-40, and double-distilled water to  
189 obtain a final volume of 20  $\mu$ L. The reactions were incubated at 25 °C for 20 min,  
190 electrophoresed in 6% (w/v) polyacrylamide gels, and then transferred to N+ nylon  
191 membranes (Millipore, Darmstadt, Germany) in 0.53 $\times$  TBE (Tris-Borate–EDTA)  
192 buffer at 380 mA and 4 °C for 30 min. Biotin-labeled DNA was detected using the  
193 LightShift<sup>™</sup> Chemiluminescent EMSA kit (Thermo Fisher). Bands were visualized  
194 using the Chemiluminescent Western Blot Detection Kit (Thermo Fisher).

### 195 **Transient assays for *in vivo* activation activity**

196 To generate the Pro CLA4, luciferase (LUC) reporters for the dual-luciferase assays,  
197 ~2500 bp from the TSS promoter region of potential targets for stress response, were  
198 inserted into pGreenII0800-LUC. To generate the CaMV 35S promoter-driven  
199 ZmCLA4 effector, the full-length coding sequence of ZmCLA4 was inserted into  
200 pUC18-35S. Transient dual-luciferase assays were performed in *N. benthamiana*  
201 leaves and checked using dual-luciferase assay reagents (Promega). Following  
202 infiltration, plants were maintained at room temperature under a 14/10 h light/dark  
203 photoperiod. Leaf protein was extracted 48 h later. The protein was extracted using a  
204 passive lysis buffer (Cat# E1910, Promega). LUC activity was measured using a  
205 GloMax®20/20 Luminometer (Cat# E5311, Promega). Then, 100 µL of Stop and  
206 Glow Buffer was added to the reaction and Renilla luciferase (REN) activity was  
207 measured. For this analysis, the ratio between LUC and REN activities was measured  
208 three times.

#### 209 **Real-time reverse transcription-PCR (qRT-PCR)**

210 Total RNA was isolated from the collected samples using TRIzol reagent (Invitrogen,  
211 Waltham, MA, USA) and treated with RNase-free DNase I to remove DNA  
212 contamination. cDNA was synthesized using an M-MLV reverse transcriptase-based  
213 cDNA first-strand synthesis kit (Invitrogen). qRT-PCR was performed using the  
214 SYBR® Green CR Master Mix Kit (Applied Biosystems, Waltham, MA, USA),  
215 following the manufacturer's protocol on a LightCycler® 480II Sequence Detection  
216 System. Relative gene expression was calculated according to the  $2^{-\Delta\Delta Ct}$  method.

217 Expression values were normalized to the *18S* ribosomal gene for qRT-PCR. The  
218 primer sequences used in the qRT-PCR assay are listed in Supplementary Table S1.

219

## 220 **Results**

### 221 **ZmCLA4 acts as a transcription repressor**

222 A previous study identified ZmCLA4 with some sequence similarity to the rice gene  
223 OsLAZY1 and Arabidopsis gene AtLAZY1 (Li *et al.*, 2007; Dong *et al.*, 2013;  
224 Yoshihara *et al.*, 2013; Zhang *et al.*, 2014). The only functional domain inferred from  
225 the sequence analysis of ZmCLA4 was an ethylene-responsive element binding  
226 factor-associated amphiphilic repression (EAR) motif located in the conserved region  
227 (Figure 1A) and was frequently identified at the C-terminal end of the protein (Ohta *et*  
228 *al.*, 2001). EAR motifs are often found in transcription regulators, and in many cases,  
229 function as repressors (Kazan, 2006; Kagale *et al.*, 2010). To confirm that ZmCLA4  
230 can activate or inhibit gene expression as a transcription factor, ZmCLA4 was first  
231 subjected to transactivation analysis in yeast. The results showed that ZmCLA4 had  
232 no transcriptional activation activity in yeast (Figure 1B). We then used the  
233 Gal4-LexA/UAS system, which tests ZmCLA4 for positive or negative transcriptional  
234 potential (Tiwari *et al.*, 2001). The reporter gene was expressed at high levels when  
235 co-transformed into protoplasts with the LexAVP16 fusion construct, which  
236 contained the coding sequences for the LexA DNA-binding domain fused in frame  
237 with the coding sequence of the VP16 transcriptional activation domain. As reported  
238 previously (Tiwari *et al.*, 2001), Gal4 fusion with the transcriptional repressor domain

239 of IAA17 (IAA17a1) strongly reduced the expression of the reporter gene. Similarly,  
240 the co-transformation of the reporter gene with a construct for the ZmCLA4-Gal4  
241 fusion protein (ZmCLA4-Gal4) significantly decreased reporter gene expression  
242 (Figure 1C). Together, these results demonstrate that ZmCLA4 is a transcriptional  
243 repressor.

#### 244 **DAP-Seq identifies genes directly targeted by ZmCLA4**

245 To investigate the regulatory mechanism mediated by *ZmCLA4*, we performed a  
246 DAP-Seq assay to uncover the genes directly targeted by ZmCLA4. Using the  
247 Illumina platform (50 bp-long pair-end reads), the DAP-Seq assay produced ~2.8  
248 million reads for each sample, of which ~2.1 million reads were uniquely mapped to  
249 the maize\_V4 genome sequence with an effective read ratio of ~75% (Table S2). We  
250 predicted ZmCLA4 binding sites using the software MACS2 (Zhang *et al.*, 2008)  
251 with a p-value < 0.05 (based on a Poisson distribution comparing the ZmCLA4  
252 sample and the control) and identified 7182 peaks across the entire genome through  
253 the ZmCLA4 binding motifs CACCGGAC, CCGARGS, and CDTCNTC (Figure 2A).  
254 Of the ZmCLA4 binding sites, 49.44% (3524 peaks) were located in the genic regions  
255 containing the genes, as well as 3 kb upstream of the start codon and 3 kb downstream  
256 of the stop codon (Figure 2B, C). Among these genic region peaks, 35.62%, 1.25%,  
257 12.34%, 14.63%, and 36.16% are located in the promoter, 5' -UTRs, introns, exons,  
258 and the transcription termination region, respectively.

259 The 3524 peaks corresponded to 3128 genes. Stringent Gene Ontology (GO)  
260 term enrichment analysis of the 3128 genes revealed that ZmCLA4 binding genes are

261 mainly involved in the regulation of biological processes, multicellular organismal  
262 processes, development, signaling, responses to stimuli, and regulation of cell  
263 proliferation, among others (Figure 2D). More specifically, ZmCLA4 binds to the  
264 upstream region of 1114 genes involved in biological regulation, signaling, regulation  
265 of cell proliferation, and response to stimuli. Of the 1114 genes bound to the upstream  
266 regions, 16 genes appeared to be responsible for the leaf angle. These genes were  
267 involved in response to phytohormones, such as ABA, auxin, and brassinolide (Table  
268 S3).

### 269 **Binding Motif Analysis Revealed Novel ZmCLA4 cis-Elements**

270 To confirm that ZmCLA4 was bound to the predicted EAR cis-element  
271 (CACCGGAC), an EMSA was performed using a purified ZmCLA4 protein and a  
272 labeled DNA probe containing the ZmCLA4-binding site (CACCGGAC). As shown  
273 in Figure 2E, ZmCLA4 bound to CACCGGAC. The addition of an 80× unlabeled  
274 competitor reduced the detected binding of ZmCLA4, and it did not bind to mutant  
275 probes (CACCGGAC mutated into TCTTTTGT). Without the ZmCLA4 protein, no  
276 bands were observed, except for the free probe. These results further confirmed the  
277 specific binding of ZmCLA4 to CACCGGAC.

278 To explore novel ZmCLA4 binding motifs, the 3 kb flanking sequences around  
279 all of the genic peak summits were applied to the motif discovery tool MEME-ChIP.  
280 The motifs CCGARGS and CDTCNTC were identified as statistically defined motifs  
281 (E-Value = 9.1 e-222, E-Value = 1.1 e-308, respectively; Figure 2A). Cis-element  
282 scanning was performed using the CCGARGS and CDTCNTC motifs on the 3 kb

283 flanking sequences around the peak maxima, and 1086 potential ZmCLA4 directly  
284 targeted genes with functional annotations were detected. Among the 1086 genes, 195  
285 were in the promoter regions and combined with CCGARGS and CDTCNTC.  
286 Confirming the labeled DNA probe contained the ZmCLA4-binding sites,  
287 CCGARGS and CDTCNTC, Figure 2E shows ZmCLA4 bound to CCGAAGC and  
288 CTTCGTC. Furthermore, the addition of the 80× unlabeled competitor reduced the  
289 detected binding of ZmCLA4, and it did not bind to mutant probes (CCGAAGC and  
290 CTTCGTC mutated into TTCTTAT and AACGTTAGT, respectively). Without the  
291 ZmCLA4 protein, no bands were observed, except for the free probe. These results  
292 confirmed the specific binding of ZmCLA4 to CCGAAGC and CTTCGTC.

293 **ZmCLA4 regulates auxin transport by directly binding to ARF and IAA**  
294 **transcription factors in maize**

295 Li *et al.* (2007) and Yoshihara *et al.* (2007) demonstrated that OsLAZY affects rice  
296 shoot gravitropism and tiller/leaf angle by negatively regulating auxin transport,  
297 leading to the asymmetric distribution of auxin. ZmCLA4, an ortholog of OsLAZY,  
298 was identified to directly bind to auxin response factors (Zm00001d036593, ARF22;  
299 Zm00001d039513, IAA26; Table S3). To understand whether ZmCLA4 functions as  
300 a transcriptional repressor of the auxin-respective genes, we performed a  
301 dual-luciferase transient transcriptional activity assay using *N. benthamiana* leaves  
302 with ZmCLA4 driven by the cauliflower-mosaic virus (CaMV) 35S promoter as an  
303 effector and LUC (the firefly luciferase-coding gene driven by -500- to -3000  
304 auxin-respective genes) as the reporter gene (Figure 3A). The results showed that

305 ZmCLA4 specifically repressed the expression of LUC with the ARF22 promoter and  
306 increased the expression of LUC with the IAA26 promoter, indicating that the two  
307 genes are target genes of ZmCLA4 (Figure 3B). Additionally, we found that  
308 ZmCLA4 binds to three ABC transporter G family members (Zm00001d042953,  
309 ABC-2; Zm00001d009243, MRP10; Zm00001d023392, ABCG37; Table S3)  
310 mediating the efflux of the auxin precursor. The results showed that ZmCLA4  
311 specifically repressed the expression of LUC with the ABC-2 promoter, MRP10  
312 promoter, and ABCG37 promoter, indicating that these genes are the target genes of  
313 ZmCLA4 (Figure 3B).

314 To understand the effects of ZmCLA4 on ARF22, IAA26, ABC-2, MRP10, and  
315 ABCG37 *in vivo*, we measured mRNA levels of the five genes by qRT-PCR in WT  
316 and ZmCLA4-RNAi plants. The ZmCLA4 was expressed in the WT but not in  
317 ZmCLA4-RNAi plants in leaf pulvinus of 9-leaf, 10-leaf, and 11-leaf, whereas  
318 mRNA levels of ARF22, ABC-2, MRP10, and ABCG37 were significantly higher,  
319 and the mRNA level of IAA26 was significantly lower in the leaf pulvini of the  
320 ZmCLA4-RNAi plants than in WT plants (Figure 3B). These results were consistent  
321 with the expression results of LUC with corresponding gene promoters.

322 **ZmCLA4 mediates brassinosteroid signal transduction by directly binding to**  
323 **BZR3 and 14-3-3 in maize**

324 Among the genes bound by ZmCLA4, there are two genes (Zm00001d053543 and  
325 BZR3; Zm00001d003401, 14-3-3; Table S3) involved in brassinosteroid signal  
326 transduction. We performed dual-luciferase transient transcriptional activity assays

327 with the ZmCLA4 protein and LUC driven by the promoter sequences of the two  
328 genes as reporters (Figure 3A). The results showed that ZmCLA4 specifically  
329 repressed the expression of LUC with the BZR3 promoter and increased the  
330 expression of the 14-3-3 promoter, indicating that the two genes are target genes of  
331 ZmCLA4 (Figure 4A).

332 To further understand the effects of ZmCLA4 on BZR3 and 14-3-3 *in vivo*, we  
333 measured mRNA levels of the two genes by qRT-PCR in WT and ZmCLA4-RNAi  
334 plants. The mRNA level of BZR3 was significantly higher in leaf pulvini of the  
335 ZmCLA4-RNAi plants than in the WT in the 9-leaf, 10-leaf, and 11-leaf. The mRNA  
336 level of 14-3-3 was significantly lower in leaf pulvini of the ZmCLA4-RNAi plants  
337 than in WT plants in the 9-leaf, 10-leaf, and 11-leaf (Figure 4A). These results were  
338 consistent with the expression results of LUC with corresponding gene promoters.

### 339 **ZmCLA4 directly regulates other phytohormone-respective genes**

340 In this study, we also found that ZmCLA4 binds to four genes (Zm00001d035167,  
341 GTE8; Zm00001d050723, SnRK2.6; Zm00001d013240, WRKY4; Zm00001d003331,  
342 WRKY72) in response to ABA, two genes (Zm00001d047425, CYP75B1;  
343 Zm00001d046758, CYP93D1) associated with JAs, two genes (Zm00001d024545,  
344 B3; Zm00001d007522, ETO1) involved in the response to ethylene. We performed  
345 dual-luciferase transient transcriptional activity assays to investigate whether  
346 ZmCLA4 could function as a repressor of these genes. The results showed that LUC  
347 expression driven by GTE8, SnRK2.6, WRKY4, WRKY72, CYP75B1, CYP93D, B3,



348 and ETO1 promoters was prominently induced by ZmCLA4 (Figure 5A), indicating  
349 that these genes are the target genes of ZmCLA4.

350 To further understand the effects of ZmCLA4 on GTE8, SnRK2.6, WRKY4,  
351 WRKY72, CYP75B1, CYP93D, B3, and ETO1 *in vivo*, we measured the mRNA  
352 levels of the eight genes by qRT-PCR in WT and ZmCLA4-RNAi plants. The mRNA  
353 levels of SnRK2.6, WRKY4, WRKY72, CYP75B1, CYP93D, B3, and ETO1 were  
354 significantly higher in leaf pulvini of the ZmCLA4-RNAi plants than in the WT in the  
355 9-leaf, 10-leaf, and 11-leaf, and the mRNA level of GTE8 was significantly lower in  
356 leaf pulvini of the ZmCLA4-RNAi plants than in the WT in the 9-leaf, 10-leaf, and  
357 11-leaf (Figure 5B). These results were consistent with the expression results of LUC  
358 with corresponding gene promoters.

### 359 **Discussion**

360 Leaf angle is a key agronomic trait determining maize plant architecture and grain  
361 yield per unit area. Maize plant architecture with more upright leaves (i.e., smaller  
362 leaf angle) decreases mutual shading and sustains light capture for photosynthesis;  
363 thus, increasing the accumulation of leaf nitrogen for grain filling and increasing grain  
364 yield. ZmCLA4 plays a negative role in the control of maize LA through the  
365 alteration of mRNA accumulation. However, the regulatory mechanism of ZmCLA4  
366 has not been reported in maize. In this study, sequence analysis showed that ZmCLA4  
367 acts as a repressor including an EAR motif located in the conserved region. First, we  
368 identified that ZmCLA4 had no transcriptional activation activity through  
369 transactivation analysis in yeast. Then, ZmCLA4 was identified as a transcriptional

370 repressor through the Gal4-LexA/UAS system. The EAR motif was located at the  
371 C-terminal end of the AtLAZY1 protein (Yoshihara *et al.*, 2013), whereas the  
372 conclusion was not proved by corresponding experiments in *Arabidopsis*. The results  
373 of the DAP-Seq assay showed that ZmCLA4 directly affected the expression of target  
374 genes through binding motifs CACCGGAC (EAR motif), CCGARGS, and  
375 CDTCNTC. This result not only further proved that ZmCLA4 acts as a repressor  
376 containing the EAR motif, but also identified two new motifs (CCGARGS and  
377 CDTCNTC), thereby providing a solid basis for further analysis of the molecular  
378 characteristics of ZmCLA4.

379 In rice, OsLAZY1 plays a negative role in polar auxin transport (PAT), and  
380 loss-of-function of OsLAZY1 greatly enhances PAT; thus, altering the endogenous  
381 IAA distribution in shoots, leading to reduced gravitropism, and the  
382 leaf/tiller-spreading phenotype of rice plants (Li *et al.*, 2007). However, the detailed  
383 molecular mechanism involved in the regulation of PAT by LAZY1 is still unclear. In  
384 this study, ZmCLA4, an ortholog of OsLAZY, directly bound to auxin response  
385 factors ARF22 and IAA26 to participate in the auxin signal transduction pathway  
386 TIR1/AFB-Aux/IAA/TPL-ARFs, thereby affecting PAT. The auxin receptor TIR1 and  
387 its homologous receptor protein AFBs interact with Aux/IAA protein, which is an  
388 inhibitor of auxin signaling. Then, auxin stabilizes TIR1/AFB and Aux/IAA protein  
389 interaction, and degrades Aux/IAA protein, thus releasing ARFs, which are inhibited  
390 by the Aux/IAA protein, to mediate auxin signal transduction (Dharmasiri *et al.*, 2005  
391 *a, b*; Kepinski and Leyser, 2005 *a, b*). ARFs are important for the normal growth and

392 development of plants. In *Arabidopsis*, they control leaf development. ARF5 is  
393 critical to leaf initiation and vein pattern formation (Garrett *et al.*, 2012).  
394 OsARF19-overexpression lines show an enlarged lamina inclination (leaf angle  
395 increase) because of an increase in its adaxial cell division in rice (Zhang *et al.*, 2015).  
396 Our qRT-PCR results showed that the mRNA level of ARF22 was significantly  
397 higher and that of IAA26 was significantly lower in the leaf pulvini of the  
398 ZmCLA4-RNAi plants than in WT plants. Additionally, ZmCLA4 directly bound to  
399 three ABC transporter G family members (ABC-2, MRP10, ABCG37), mediating the  
400 efflux of the auxin precursor. The study showed that ABCG36 mediates the efflux of  
401 the auxin precursor indole 3-butyric acid (IBA) from roots, as evidenced by  
402 hypersensitive root growth phenotypes of *abcg36* mutants in the presence of IBA or  
403 precursors of synthetic auxin analogs in *Arabidopsis* (Strader *et al.*, 2009;  
404 Ruźzic̄ka *et al.*, 2010). The function as a transporter of IBA and various auxinic  
405 compounds has also been assigned to ABCG37/PDR9, as evidenced by altered  
406 responsiveness of *abcg37* mutant plants to synthetic auxins and inhibitors of auxin  
407 transport, but not to IAA, the endogenous auxin (Ruźzic̄ka *et al.*, 2010; Ito and  
408 Gray, 2006; Strader *et al.*, 2008). In this study, the qRT-PCR results showed that  
409 mRNA levels of ABC-2, MRP10, and ABCG37 were significantly higher in leaf  
410 pulvini of the ZmCLA4-RNAi plants than in WT plants. These results implied that  
411 ZmCLA4 could negatively regulate PAT by directly repressing ABC transporter G  
412 family members. Overall, these results suggest that ZmCLA4 represses ARF22 by

413 directly promoting IAA26 or directly repressing ABCGs or ARF22 and then mediated  
414 auxin signal transduction, and finally led to a decrease in leaf angle.

415 The signaling pathways of various hormones in plants often cross each other,  
416 forming a complex regulatory network. In terms of auxin, the interaction between BR,  
417 ABA, JA, and other hormones has been extensively studied. In rice, OsLAZY1 plays  
418 a negative role in PAT (Li *et al.*, 2007). Except for ZmCLA4 directly binding to  
419 ARF22 and IAA26 to participate in the pathway, ZmCLA4 not only mediates  
420 brassinosteroid signal transduction through directly binding to BZR3 and 14-3-3 in  
421 maize, but also binds to four genes (GTE8, SnRK2.6, WRKY4, WRKY72) in  
422 response to ABA, two genes (CYP75B1 and CYP93D1) associated with JA, and two  
423 genes (B3, ETO1) involved in the response to ethylene. In rice, the BR transcription  
424 factor BZR1 increases leaf angle, whereas RNAi:BZR1 plants have leaves with small  
425 inclinations (Bai *et al.*, 2007; Zhang *et al.*, 2012). BZR3, as a homologous gene of  
426 BZR1, could increase the leaf angle in maize. BRs are a group of steroid hormones  
427 with a paracrine mode of action that determines important traits, such as plant  
428 architecture and have been extensively reported as key regulators of leaf angle in  
429 cereals. This conclusion is derived from the numerous BR biosynthesis or signaling  
430 mutants investigated in rice, maize, and sorghum with consistently reduced leaf  
431 angles (Yamamuro *et al.*, 2000; Morinaka *et al.*, 2006; Sakamoto *et al.*, 2006; Wang  
432 *et al.*, 2008; Divi and Krishna, 2009; Makarevitch *et al.*, 2012; Tong *et al.*, 2014; Sun  
433 *et al.*, 2015; Best *et al.*, 2016; Feng *et al.*, 2016; Hirano *et al.*, 2017). The study of the  
434 BR signaling pathway in Arabidopsis and rice is clear; that is, BR is sensed by BRI1

435 and its two homologous proteins BRL1 and BRL3. The unphosphorylated BKI1  
436 interacts with BRI1, prevents the interaction between BRI1 and BAK1, and inhibits  
437 the activation of BR signaling (Jiang *et al.*, 2015). BKI1 also competitively binds to  
438 the 14-3-3 protein that assists in the degradation of BZR1, reducing the negative  
439 regulatory effect of the 14-3-3 protein on BZR1, and then rapidly promotes the  
440 transmission of the BR signal (Wang *et al.*, 2011). Based on our data, mRNA levels  
441 of BZR3 were significantly higher in ZmCLA4-RNAi plants than in the WT, and  
442 mRNA levels of 14-3-3 were significantly lower in ZmCLA4-RNAi plants than in  
443 WT plants, indicating that ZmCLA4 was involved in BRI1/BAK1 mediated BR  
444 signaling by directly binding BZR3 and 14-3-3 to regulate leaf angle in maize.

445       Early evidence suggests that ABA reduces leaf angle and inhibits the action of  
446 externally applied BRs (Wada *et al.*, 1981). WRKYs include ABA-responsive  
447 elements and might function as positive regulators in mediating plant responses to  
448 ABA (Jiang and Deyholos, 2009; Gao *et al.*, 2011). Accumulating evidence has  
449 revealed that WRKY proteins play diverse roles in responses to biotic and abiotic  
450 stresses and are involved in various processes of plant growth and development by  
451 regulating the expression of target genes via binding to the W-box cis-element  
452 (Rushton *et al.*, 2010). For example, OsWRKY53 overexpression led to enlarged leaf  
453 angles and increased grain size, in contrast to the erect leaves and smaller seeds in the  
454 *oswrky53* mutant (Tian *et al.*, 2017). Based on our data, the mRNA levels of WRKY4  
455 and WRKY72 were significantly higher in ZmCLA4-RNAi plants than in WT plants,  
456 indicating that ZmCLA4 directly repressed the expression of ABA-responsive

457 WRKY4/72 (homologous gene of OsWRKY53) and mediated the ABA pathway to  
458 reduce leaf angle in maize.

459 JAs also regulate leaf angles through their interaction with BR metabolism.  
460 Methyl-JA represses the expression of BR biosynthesis and signaling genes, reducing  
461 endogenous levels of BRs (Gan *et al.*, 2015), and thereby, leaf angle. CYP75B1 and  
462 CYP93D1 were both annotated as “response to jasmonic acid (GO:0009753).” Heitz  
463 *et al.* (2012) showed that cytochrome P450, CYP94C1, and CYP94B3 are involved in  
464 JA-Ile oxidation. CYP93G1 converts naringenin to apigenin, and then CYP75B4  
465 converts apigenin to luteolin, which is further metabolized to triclin through  
466 *O*-methyltransferase activity and the chrysoeriol 5'-hydroxylase activity of CYP75B4  
467 in rice (Lam *et al.*, 2015; Sangkyu *et al.*, 2016). Tricin derivatives have been reported  
468 to be incorporated into lignin (Li *et al.*, 2016). These results imply that ZmCLA4  
469 directly regulates CYP75B1 and CYP93D1 (homologous genes of CYP75B and  
470 CYP93G, respectively) to mediate the JA pathway and affect lignin biosynthesis,  
471 thereby affecting the leaf angle in maize.

472 Ethylene is a gaseous plant hormone that plays a key role in leaf senescence  
473 (Abeles *et al.*, 1992). BR-induced rice lamina joint inclination was accompanied by  
474 increased ethylene production because of greater expansion of the adaxial cells  
475 relative to the dorsal cells in the lamina joint (Cao and Chen, 1995). We also found  
476 that ZmCLA4 binds two genes (B3 and ETO1) involved in response to ethylene. In  
477 particular, B3 encodes a B3 domain containing a protein homologous to ZmRAVL1  
478 in maize (Tian *et al.*, 2019). ZmRAVL1 RNAi and knockout lines exhibited smaller

479 leaf angles in the lower, middle, and upper leaves compared with that of the WT  
480 plants by increasing adaxial sclerenchyma cells in the ligular region (Tian *et al.*,  
481 2019). From our data, B3 was significantly higher in ZmCLA4-RNAi plants than in  
482 WT plants. These results showed that ZmCLA4 decreased the leaf angle by directly  
483 repressing the expression of ethylene-responsive B3 in maize.

484 In summary, our results demonstrated that ZmCLA4, a cross node of five major  
485 phytohormone signaling pathways, negatively regulates leaf angle in maize. It directly  
486 affects the patterns of gene transcription. We built a hierarchical regulatory model  
487 describing ZmCLA4 and ZmCLA4-targeted genes to explain the effects on the  
488 formation of leaf angle during maize development. Our data suggest that ZmCLA4  
489 directly represses genes associated with a range of biological responses, including  
490 auxin, BR, ABA, JA, and ethylene signaling pathways, resulting in an erect leaf angle.  
491 The manipulation of the regulation of leaf angle in maize reported herein, to adapt to  
492 high-density planting, has provided important insights that will help in directing  
493 future approaches for the production of high-yield maize varieties. A better  
494 understanding of ZmCLA4 regulatory pathways will provide new insights into the  
495 effects of ZmCLA4 through multiple signaling pathways in the future.

496

#### 497 **Acknowledgements**

498 This research was supported by grants from the Central Plains Science and  
499 Technology Innovation Leading Talents (194200510021), National Key Research and

500 Development Program of China (2016YFD0101803) and National Natural Science  
501 Foundation of China (No. 31871639).

502

503 **Author contributions**

504 D.D., S. H. Z. R., D. Z., H. Z., Y. D., Z. L., F. Z., Q. Z., J. X. H. L. and H. C  
505 conducted molecular biology experiments; D. D. and H. S. analyze the data. Y. C,  
506 L.K., D. D. and S. H. designed the experiments and wrote the manuscript.

507

508 **Conflict of interest**

509 The authors declare they have no conflicts of interest.

510 **Reference**

- 511 **Abeles F, Morgan P, Saltveit M.** 1992. Ethylene in Plant Biology. Ethylene in plant biology.  
512 Academic Press, New York, USA.
- 513 **Bai M, Zhang L, Gampala S, Zhu S, Song W, Chong K, Wang Z.** 2007. Functions of OsBZR1  
514 and 14-3-3 proteins in brassinosteroid signaling in rice. Proceedings of the National  
515 Academy of Sciences **104**, 13839-13844.
- 516 **Best N, Hartwig T, Budka J, Fujioka S, Johal G, Schulz B, Dilkes B.** 2016. nana plant2  
517 encodes a maize ortholog of the Arabidopsis brassinosteroid biosynthesis gene DWARF1,  
518 identifying developmental interactions between brassinosteroids and gibberellins. Plant  
519 Physiology **171**, 2633–2647.
- 520 **Cao Y, Zeng H, Ku L, Ren Z, Han Y, Su H, et al.** 2020. ZmIBH1-1 regulates plant architecture  
521 in maize. Journal of Experimental Botany Doi: 10.1093/jxb/eraa052/5716501
- 522 **Cao H, Chen S.** 1995. Brassinosteroid-induced rice lamina joint inclination and its relation to  
523 indole-3-acetic acid and ethylene. Plant Growth Regulation **16**, 189-196.



- 524 **Chen X, Xu D, Liu Z, Yu T, Mei X, Cai Y.** 2015. Identification of QTL for leaf angle and leaf  
525 space above ear position across different environments and generations in maize (*Zea mays*  
526 L.). *Euphytica* **204**, 395–405.
- 527 **Chen Y, Fan X, Song W, et al.** 2011. Over-expression of OsPIN2 leads to increased tiller  
528 numbers, angle and shorter plant height through suppression of OsLAZY1. *Plant*  
529 *Biotechnology Journal* **10**:139-149.
- 530 **Dharmasiri N, Dharmasiri S, Estelle M.** 2005a. The F-box protein TIR1 is an auxin receptor.  
531 *Nature* **435**, 441-445.
- 532 **Dharmasiri N, Dharmasiri S, Weijers D, Lechner E, Yamada M, Hobbie L, Ehrismann J,**  
533 **Jurgens G, Estelle M.** 2005b. plant development is regulated by a family of auxin receptor F  
534 box proteins. *Dev Cell* **9**, 109-119
- 535 **Divi U, Krishna P.** 2009. Brassinosteroid: a biotechnological target for enhancing crop yield and  
536 stress tolerance. *New Biotechnology* **26**, 131–136.
- 537 **Dong Z, Jiang C, Chen X, Zhang T, et al.** 2013. Maize LAZY1 Mediates Shoot Gravitropism  
538 and Inflorescence Development through Regulating Auxin Transport, Auxin Signaling, and  
539 Light Response. *Plant Physiology* **163**, 1306-22.
- 540 **Dubois P, Brutnell T.** 2011. Topology of a maize field: distinguishing the influence of  
541 end-of-day far-red light and shade avoidance syndrome on plant height. *Plant signaling &*  
542 *behavior* **6**, 467-470.
- 543 **Feng Z, Wu C, Wang C, et al.** 2016. SLG controls grain size and leaf angle by modulating  
544 brassinosteroid homeostasis in rice. *Journal of Experimental Botany* **67**, 4241-4253.
- 545 **Gampala S, Hagenbeek D, Rock C.** 2001. Functional Interactions of Lanthanum and  
546 Phospholipase D with the Abscisic Acid Signaling Effectors VP1 and ABI1-1 in Rice  
547 Protoplasts. *The Journal of biological chemistry* **276**, 9855–9860.
- 548 **Garrett J, Meents M, Blackshaw M, Blackshaw L, Hou H, Styranko D, Schultz E.** 2012. A  
549 novel, semi-dominant 'allele of MONOPTEROS provides insight into leaf initiation and vein  
550 pattern formation. *Planta* **236**, 297–312.

- 551 **Gao QM, Venugopal S, Navarre D, Kachroo A.** 2011. Low oleic acid-derived repression of  
552 jasmonic acid-inducible defense responses requires the WRKY50 and WRKY51 proteins.  
553 *Plant Physiol.* **15**, 464–476.
- 554 **Gan L, Wu, Wu D, et al.** 2015. Methyl jasmonate inhibits lamina joint inclination by repressing  
555 brassinosteroid biosynthesis and signaling in rice. *Plant Science* **241**, 238-245.
- 556 **Heitz T, Widemann E, Lugan R, et al.** 2012. Cytochromes P450 CYP94C1 and CYP94B3  
557 Catalyze Two Successive Oxidation Steps of Plant Hormone Jasmonoyl-isoleucine for  
558 Catabolic Turnover. *Journal of Biological Chemistry* **287**, 6296-6306.
- 559 **Hirano K, Kawamura M, Araki-Nakamura S, Fujimoto H, Ohmae- Shinohara K, et al.** 2017.  
560 Sorghum DW1 positively regulates brassinosteroid signaling by inhibiting the nuclear  
561 localization of BRASSINOSTEROID INSENSITIVE 2. *Scientific Reports* **7**, 126.
- 562 **Ito H, Gray, W.** 2006. A gain-of-function mutation in the Arabidopsis pleiotropic drug resistance  
563 transporter PDR9 confers resistance to auxinic herbicides. *Plant Physiol.* **142**, 63-74
- 564 **Jiang J, Wang T, Wu Z, et al.** 2015. The intrinsically disordered protein BKI1 is essential for  
565 inhibiting BRI1 signaling in plants. *Mol Plant* **8**, 1675-1678
- 566 **Jiang Y, Deyholos M.** 2009. Functional characterization of Arabidopsis NaCl-inducible  
567 WRKY25 and WRKY33 transcription factors in abiotic stresses; *Plant Mol. Biol.* **69**, 91-105
- 568 **Kazan K.** 2006. Negative regulation of defense and stress genes by EAR-motif-containing  
569 repressors. *Trends Plant Sci.* **11**, 109-112.
- 570 **Kagale S, Links M, Rozwadowski K.** 2010. Genome-wide analysis of ethylene-responsive  
571 element binding factor-associated amphiphilic repression motif-containing transcriptional  
572 regulators in Arabidopsis. *Plant Physiol.* **152**, 1109-1134.
- 573 **Kepinski S, Leyser O.** 2005. The Arabidopsis F-box prorelin TIR1 is an auxin receptor. *Nature*  
574 **435**, 446-451
- 575 **Kepinski S, Leyser O.** 2005. Plant Development: Auxin in Loops. *Current Biology* **15**, 208-210.
- 576 **Ku L, Zhao W, Zhang J, Wu L, Wang C, Wang P, Zhang W, Chen.** 2010. Quantitative trait  
577 loci mapping of leaf angle and leaf orientation value in maize (*Zea mays* L.). *Theoretical and*  
578 *Applied Genetics* **121**, 951-959.

- 579 **Ku L, Zhang J, Guo S, et al.** 2012. Integrated multiple population analysis of leaf architecture  
580 traits in maize (*Zea mays* L.). *Journal of Experimental Botany*, 63, 261-274.
- 581 **Ku L, Wei X, Zhang S, Zhang J, Guo S, Chen Y.** 2011. Cloning and characterization of a  
582 putative TAC1 ortholog associated with leaf angle in maize (*Zea mays* L.). *PLoS One* 6,  
583 e20621.
- 584 **Lambert R, Johnson R.** 1978. Leaf angle, tassel morphology, and the performance of maize  
585 hybrids. *Crop Sci*, 818, 499-502
- 586 **Lam P, Liu H, Lo C.** 2015. Completion of triclin biosynthesis pathway in rice: Cytochrome P450  
587 75B4 is a unique chrysoeriol 5'-hydroxylase. *Plant Physiol.* **168**, 1527-1536.
- 588 **Langmead B, Salzberg SL.** 2012. Fast gapped-read alignment with Bowtie 2. *Nature methods* 9,  
589 357-359.
- 590 **Li C, Li Y, Shi Y, Song Y, Zhang D, Buckler E, Zhang Z, Wang T, Li Y.** 2015. Genetic  
591 control of the leaf angle and leaf orientation value as revealed by ultra-high density maps in  
592 three connected maize populations. *PLoS One* **10**, 1-13.
- 593 **Li M, Pu Y, Yoo C, Ragauskas A.** 2016. The occurrence of triclin and its derivatives in plants.  
594 *Green Chem.* 18, 1439-1454.
- 595 **Li PJ, Wang YH, Qian Q, Fu Z, Wang M, Zeng D, Li B, Wang X, Li J.** 2007. LAZY1 controls  
596 rice shoot gravitropism through regulating polar auxin transport. *Cell Research* **17**, 402-410.
- 597 **Li Z, Liang Y, Yuan Y, Wang L, Meng X, Xiong G, Zhou J, Cai Y, Han N, Hua L, Liu G, Li  
598 J., and Wang Y.** 2019. OsBRXL4 Regulates Shoot Gravitropism and Rice Tiller Angle  
599 through Affecting LAZY1 Nuclear Localization. *Mol. Plant.* **12**, 1143-1156.
- 600 **Lu M, Zhou F, Xie CX, Li MS, Xu YB, Marilyn W, Zhang SH.** 2007 Construction of a SSR  
601 linkage map and mapping of quantitative trait loci (QTL) for leaf angle and leaf orientation  
602 with an elite maize hybrid. *Hereditas* **29**, 1131-1138.
- 603 **Makarevitch I, Thompson A, Muehlbauer GJ, Springer NM.** 2012. Brd1 gene in maize  
604 encodes a brassinosteroid C-6 oxidase. *PLoS One* **7**, e30798.
- 605 **McCormick RF, Truong SK, Mullet JE.** 2016. 3D Sorghum reconstructions from depth images  
606 identify QTL regulating shoot architecture. *Plant Physiology* **172**, 823-834.

- 607 **Mickelson SM, Stuber CS, Senior L, Kaepler SM.** 2002. Quantitative trait loci controlling leaf  
608 and tassel traits in a B73×MO17 population of maize. *Crop Science* **42**, 1902-1909.
- 609 **Morinaka Y, Sakamoto T, Inukai Y, getsuma M, Kitano H, Ashikari M, Matsuoka M.** 2006.  
610 Morphological alteration caused by brassinosteroid insensitivity increases the biomass and  
611 grain production of rice. *Plant Physiology* **141**, 924-931.
- 612 **O' Malley RC, Huang SS Song L, et al.** 2016. Cistrome and Epicistrome Features Shape the  
613 Regulatory DNA Landscape. *Cell* **165**, 1280-1292.
- 614 **Ohta M.** 2001. Repression Domains of Class II ERF Transcriptional Repressors Share an  
615 Essential Motif for Active Repression. *The Plant Cell*, 13, 1959-1968.
- 616 **Ren Z, Wu L, Ku L, Wang H, Zeng H, e al,** 2020, ZmL11 regulates leaf angle by directly  
617 affecting *liguleless1* expression in maize. *Plant Biotechnology Journal*. **18**, 881-883
- 618 **Ru□z□ic□ka K. et al.** 2010. Arabidopsis PIS1 encodes the ABCG37 transporter of auxinic  
619 compounds including the auxin precursor indole-3- butyric acid. *Proc. Natl. Acad. Sci.* **107**,  
620 10749–10753 (2010).
- 621 Rushton PJ, Somssich IE, Ringler P, Shen QJ. 2010. WRKY transcription factors. *Trends Plant*  
622 *Sci* **15**, 247–258
- 623 **Sakamoto T, Morinaka Y, Ohnishi T, et al.** 2006. Erect leaves caused by brassinosteroid  
624 deficiency increase biomass production and grain yield in rice. *Nature Biotechnology* **24**,  
625 105–109.
- 626 **Sangkyu P, Min C, Jong L, et al.** 2016. Molecular and Biochemical Analysis of Two Rice  
627 Flavonoid 3'-Hydroxylase to Evaluate Their Roles in Flavonoid Biosynthesis in Rice Grain.  
628 *International Journal of Molecular Sciences* **17**, 1549-1553.
- 629 **Strader L, Bartel B.** 2009. The Arabidopsis PLEIOTROPIC DRUG RESISTANCE8/ABCG36  
630 ATP binding cassette transporter modulates sensitivity to the auxin precursor  
631 indole-3-butyric acid. *Plant Cell* **21**, 1992–2007.
- 632 **Strader L, Monroe-Augustus M, Rogers K, Lin G, Bartel B.** 2008. Arabidopsis *iba response5*  
633 suppressors separate responses to various hormones. *Genetics* **180**, 2019-2031.

- 634 **Sun S, Chen D, Li X, Qiao S, Shi C, Li C, Shen H, Wang X.** 2015. Brassinosteroid signaling  
635 regulates leaf erectness in *Oryza sativa* via the control of a specific U-type cyclin and cell  
636 proliferation. *Developmental Cell* **34**, 220–228.
- 637 **Tian F, Bradbury P, Brown P, Hung H, Sun Q, Flint-Garcia S, Rocheford T, McMullen MD,**  
638 **Holland J, Buckler E.** 2011 Genome-wide association study of leaf architecture in the maize  
639 nested association mapping population. *Nature Genetics* **43**, 159-162.
- 640 **Tian J, Wang C, Xia J, Wu L, Xu G, Wu W et al.** 2019. Teosinte ligule allele narrows plant  
641 architecture and enhances high-density maize yields. *Science* **365**, 658-664.
- 642 **Tian X, Li X, Zhou W, et al.** 2017. Transcription factor OsWRKY53 positively regulates  
643 brassinosteroid signaling and plant architecture. *Plant Physiology* 00946.
- 644 **Tiwari SB, Wang X-J, Hagen G, Guilfoyle TJ.** 2001. AUX/IAA Proteins Are Active Repressors,  
645 and Their Stability and Activity Are Modulated by Auxin. *The Plant cell* **13**, 2809–2822.
- 646 **Tong H, Xiao Y, Liu D, Gao S, Liu L, Yin Y, Jin Y, Qian Q, Chu C.** 2014. Brassinosteroid  
647 regulates cell elongation by modulating gibberellin metabolism in rice. *The Plant Cell* **26**,  
648 4376-4393.
- 649 **Wang L, Xu Y, Zhang C, Ma Q, Joo SH, Kim SK, Xu Z, Chong K.** 2008. OsLIC, a novel  
650 CCCH-type zinc finger protein with transcription activation, mediates rice architecture via  
651 brassinosteroids signaling. *PLoS One* **3**, e3521.
- 652 **Wang H, Yang C, Zhang C, et al.** 2011. Dual role of BKII and 14-3-3 s in brassinosteroid  
653 signaling to link receptor with transcription factors. *Dev Cell* **21**, 825–834
- 654 **Wada K, Marumo S, Ikekawa N, Morisaki M, Mori K.** 1981. Brassinolide and  
655 homobrassinolide promotion of lamina inclination of rice seedlings. *Plant and Cell*  
656 *Physiology* **22**, 323-325.
- 657 **Yang C, Xie F, Jiang Y, et al.** 2018. Phytochrome A negatively regulates the shade avoidance  
658 response by increasing auxin/indole acidic acid protein stability. *Dev Cell*, **44**, 29-41.e4
- 659 **Yamamuro C, Ihara Y, Wu X, Noguchi T, Fujioka S, Takatsuto S, Ashikari M, Kitano H,**  
660 **Matsuoka M.** 2000. Loss of function of a rice brassinosteroid insensitive1 homolog prevents  
661 internode elongation and bending of the lamina joint. *The Plant Cell* **12**, 1591–1606.

- 662 **Yoshihara T, Iino M.** 2007. Identification of the gravitropism-related rice gene LAZY1 and  
663 elucidation of LAZY1-dependent and -independent gravity signaling pathways. *Plant and*  
664 *Cell Physiology* **48**, 678-688.
- 665 **Yoshihara T, Spalding EP, Iino M.** 2013. AtLAZY1 is a signaling component required for  
666 gravitropism of the *Arabidopsis thaliana* inflorescence. *The Plant Journal* **74**, 267-279.
- 667 **Zhang C, Xu Y, Guo S, Zhu J, Huan Q, Liu H, Wang L, Luo G, Wang X, Chong K.** 2012.  
668 Dynamics of brassinosteroid response modulated by negative regulator LIC in rice. *PLoS*  
669 *Genetics* **8**, e1002686.
- 670 **Zhang J, Ku L X, Han Z P, et al.** 2014. The ZmCLA4 gene in the qLA4-1 QTL controls leaf  
671 angle in maize (*Zea mays* L.). *Journal of Experimental Botany* **65**, 5063-5076.
- 672 **Zhang N, Yu H, Yu H, et al.** 2018. A Core Regulatory Pathway Controlling Rice Tiller Angle  
673 Mediated by the LAZY1-dependent Asymmetric Distribution of Auxin. *The Plant Cell* **30**,  
674 1461-1475.
- 675 **Zhang S, Wang S, Xu Y, et al.** 2015. The auxin response factor, OsARF19, controls rice leaf  
676 angles through positively regulating OsGH3-5 and OsBRI1. *Plant, Cell & Environment* **38**,  
677 638-654.
- 678 **Zhang X, Huang C, Wu D, et al.** 2017. High-throughput phenotyping and QTL mapping reveals  
679 the genetic architecture of maize plant growth. *Plant Physiology* **173**, 1554-1564.
- 680 **Zhang Y, Liu T, Meyer CA, et al.** 2008. Model-based analysis of ChIP-Seq (MACS). *Genome*  
681 *biology* **9**, R137.
- 682
- 683
- 684
- 685
- 686
- 687

688

689

690

691

692

693

694

695 **Figure legends**

696 **Fig. 1. Characteristic analysis of ZmCLA4 protein.**

697 **(A)** Sequence alignment of maize CLA4, rice LAZY1, and Arabidopsis AtLAZY1

698 amino acid sequences. The alignment was performed using DNAMAN. Identical

699 amino acids are in black and the conserved EAR motif is underlined in red. **(B)**

700 Transactivation analysis of ZmCLA4 fused to the GAL4 DNA-binding domain in

701 yeast. **(C)** Transient assays of the transcriptional activity of ZmIBH1-1. *Nicotiana*

702 *benthamiana* leaves were transformed with the reporter (UAS-LUC) and effector

703 constructs (left), and the reporter gene expression was determined (right). Data are

704 means ( $\pm$  SD), n = 3. UAS-LUC, reporter construct containing Gal4 and LexA

705 binding sites, and a 35S minimal promoter upstream of the coding sequence of LUC;

706 VP16, VP16 fused to the LexA DNA-binding domain (DBD); Gal4, Gal4 DBD;

707 IAA17a1, the transcription repression domain of IAA17 fused to the Gal4 DBD;

708 ZmCLA4, full-length ZmCLA4 fused to Gal4 DBD. The LUC reporter gene

709 expression was normalized to the luciferase activity and presented as values relative  
710 to the VP16 control, the value of which was set as 1.

711 **Fig. 2. DAP-seq analysis of maize *ZmCLA4*.**

712 (A) *ZmCLA4* binding to CACCGGAC, CCGARGS, and CDTCNTC motifs as  
713 identified by the MEME-ChIP. (B) Distribution of the *ZmCLA4* binding sites. (C)  
714 Comparison of *ZmCLA4*-occupied peaks using two biological replicates. (D) GO  
715 annotation of targeted genes bound by *ZmCLA4*. The y-axis represents the percentage  
716 of genes related to each functional category. (E) Results of EMSAs confirming  
717 *ZmCLA4* binding to CACCGGAC, CCGARGS, and CDTCNTC.

718 **Fig. 3. *ZmCLA4* functions as a transcriptional repressor of the genes involved in**  
719 **response to auxins.**

720 (A) The 35S:REN-Pro PR:LUC reporter constructs were transiently expressed in  
721 *Nicotiana benthamiana* leaves together with the control vector or 35S: *ZmCLA4*  
722 effector. (B) The LUC/REN ratio represents the relative activity of the gene  
723 promoters (\*P < 0.05, \*\*P < 0.01). (C) Expression analysis of the targeted genes in  
724 wild-type and *ZmCLA4*-RNAi plants using leaf pulvini from the 9-leaf, 10-leaf, and  
725 11-leaf stages.

726 **Fig. 4. *ZmCLA4* functions as a transcriptional repressor of the genes involved in**  
727 **response to brassinolide.**

728 (A) The LUC/REN ratio represents the relative activity of the gene promoters (\*P <  
729 0.05, \*\*P < 0.01). (B) Expression analysis of the targeted genes involved in responses



730 to brassinolide in wild-type and ZmCLA4-RNAi plants using leaf pulvini from the  
731 9-leaf, 10-leaf, and 11-leaf stages.

732 **Fig. 5. ZmCLA4 functions as a transcriptional repressor of other**  
733 **phytohormone-related genes.**

734 (A) The LUC/REN ratio represents the relative activity of the gene promoters (\*P <  
735 0.05, \*\*P < 0.01). (B) Expression analysis of the other phytohormone-respective  
736 targeted genes in wild-type and ZmCLA4-RNAi plants using leaf pulvini from the  
737 9-leaf, 10-leaf, and 11-leaf stages.

738 **Fig. 6. A schematic model for leaf angle formation in maize.**

739 The arrows between the genes represent promotion or activation, and the  $\perp$  bars  
740 between the genes indicate suppression. The green circles represent auxin-responsive  
741 genes, the yellow circle represents the jasmonic acid-responsive gene, the bright green  
742 circles represent the brassinosteroid-responsive genes, the orange circles represent  
743 ethylene-responsive genes, and the lavender circle represents the abscisic  
744 acid-responsive genes.

745

746 **Supporting information**

747 The following materials are available in the online version of this article.

748 **Table S1. Primer sequences used for the experiments.**

749 **Table S2. The summary of reads analysis.**

750 **Table S3. CLA4 regulating leaf angle-related genes in maize.**

751

752

753

754

755

756

757

758

759

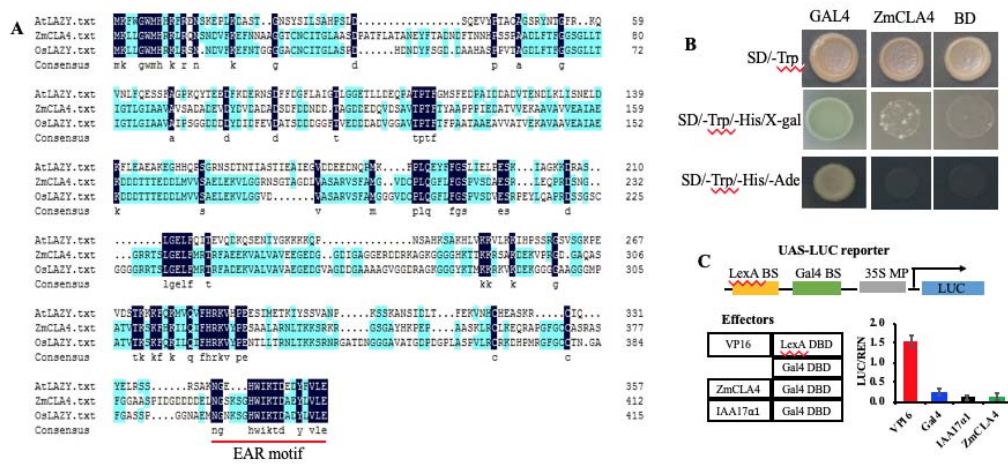

760

761 **Fig. 1. Characteristic analysis of ZmCLA4 protein.**

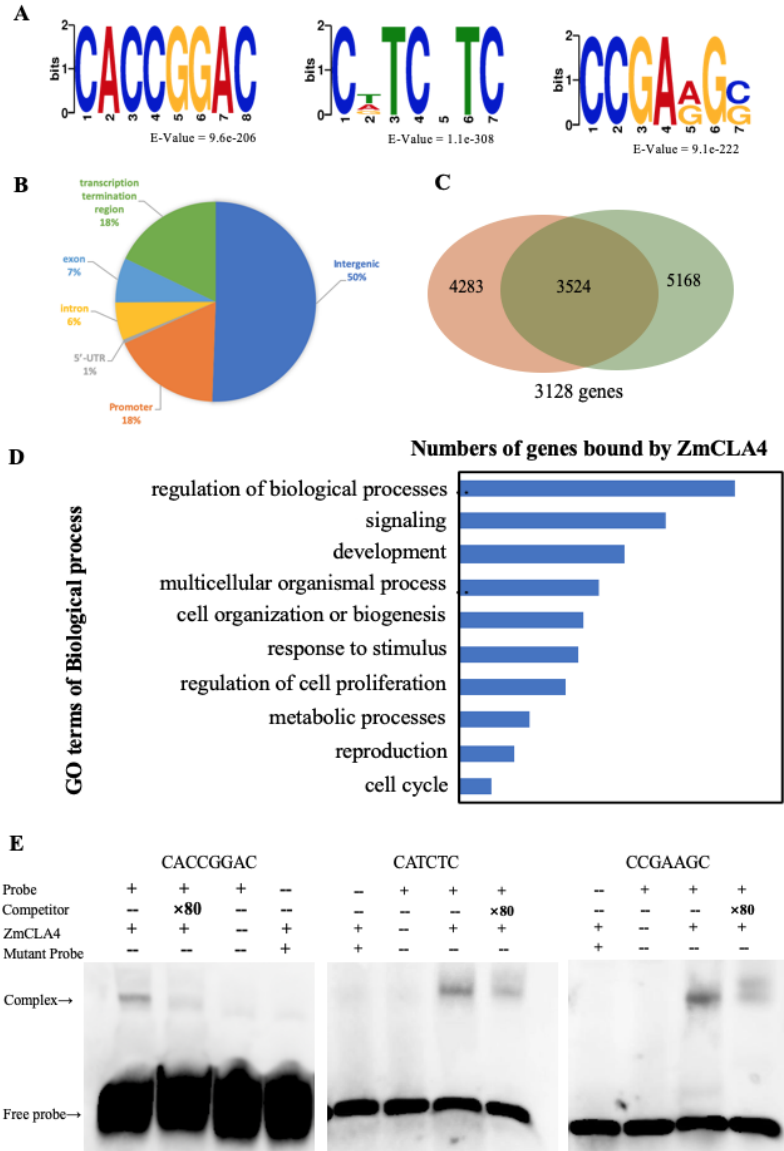

762

763 **Fig. 2. DAP-seq analysis of maize *ZmCLA4*.**

764

765

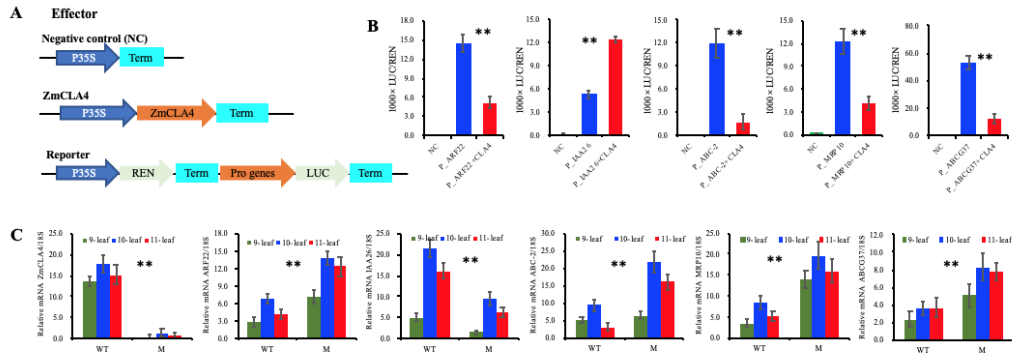

766

767 **Fig. 3. ZmCLA4 functions as a transcriptional repressor of the genes involved in**  
 768 **response to auxins.**

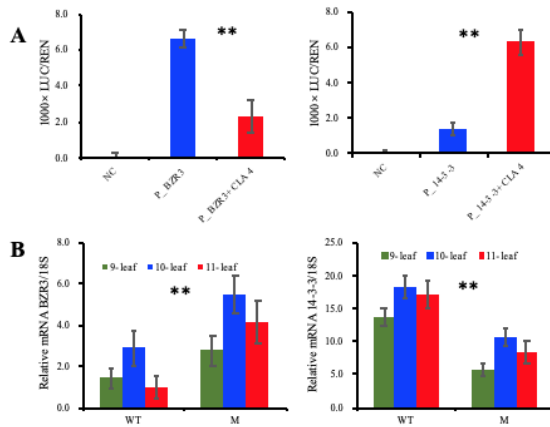

769

770 **Fig. 4. ZmCLA4 functions as a transcriptional repressor of the genes involved in**  
 771 **response to brassinolide.**

772

773

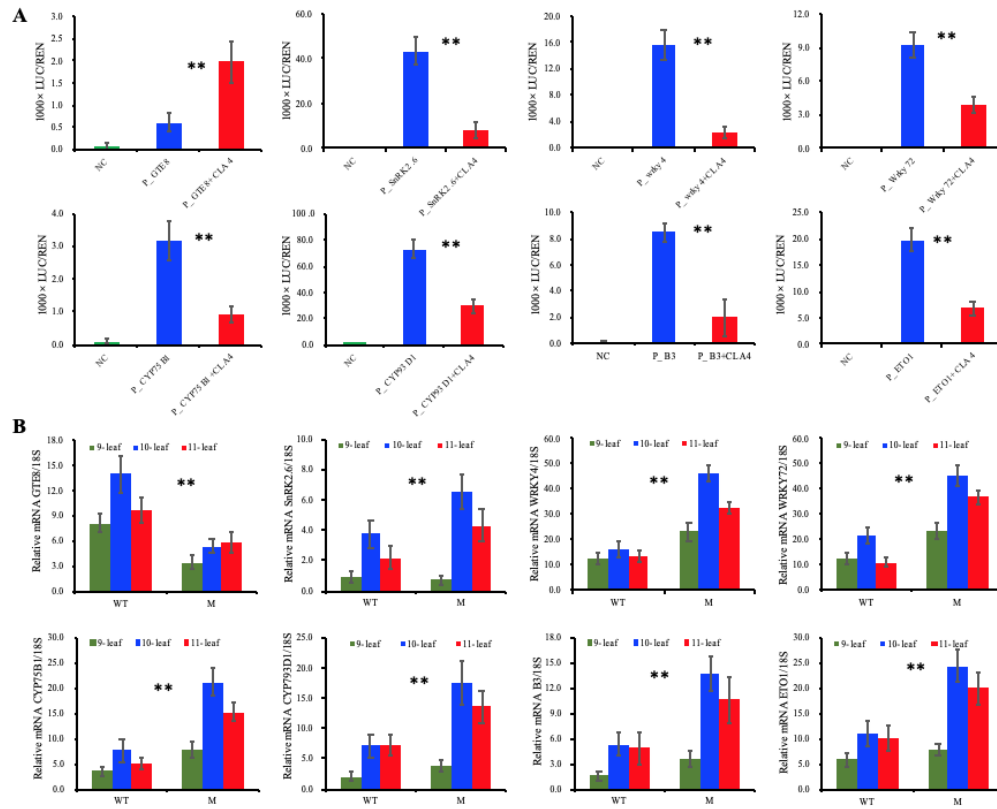

774

775 **Fig. 5. ZmCLA4 functions as a transcriptional repressor of other**

776 **phytohormone-related genes.**

777

778

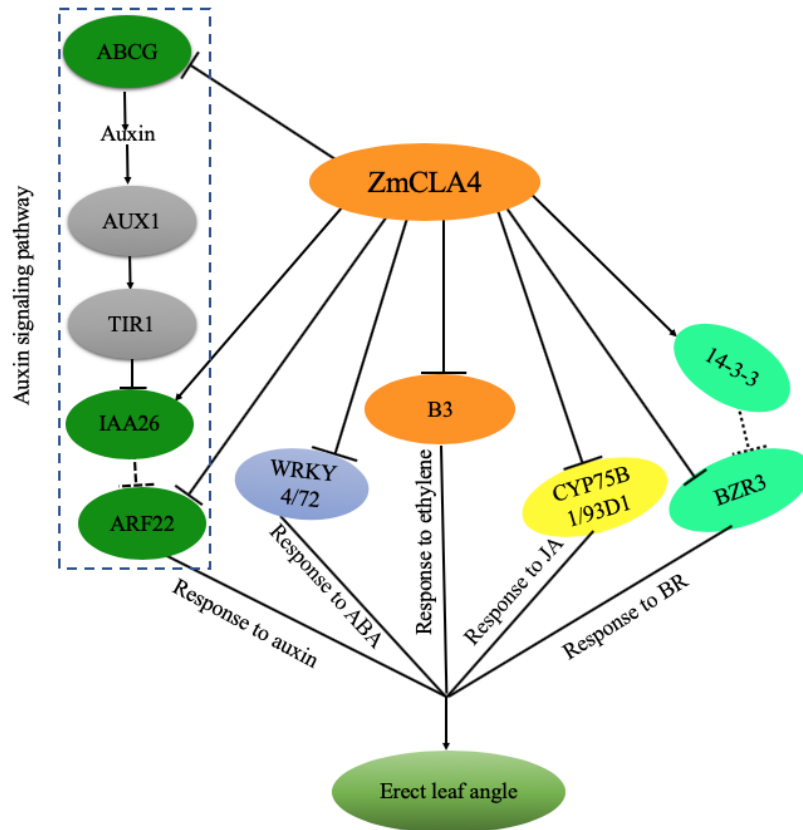

779

780 **Fig. 6. A schematic model for leaf angle formation in maize.**
